# Supplementary material for: Metal–organic frameworks derived from bis-pyridyl-bis-amide ligands : Effect of positional isomerism of the ligands, hydrogen bonding backbone, counter anions on the supramolecular structures and selective crystallization of the sulfate anion
Source: Royal Society of Chemistry journal article supplement (doi:10.1039/b816221b), 2009-01-01
Supplement: b816221b.pdf [file b816221b.pdf]

## Electronic Supplementary Information (ESI)

### **Metal-organic frameworks derived from bis-pyridyl-bis-amide ligands: Effect of positional isomerism of the ligands, hydrogen bonding backbone, counter anions on the supramolecular structures and selective crystallization of sulfate anion**

Adarsh N. N., D. Krishna Kumar, and Parthasarathi Dastidar\*

*Department of Organic Chemistry, Indian Association for the Cultivation of Science (IACS), Jadavpur, 2A&2B Raja S C Mullick Road, Kolkata – 700032, West Bengal, India*  
*E-mail: parthod123@rediffmail.com; ocpd@iacs.res.in (PD)*

### Molecular Plots and Hydrogen Bonding Parameters for L1, MOF-1, MOF-2 and MOF-3

#### Molecular Plot of L1

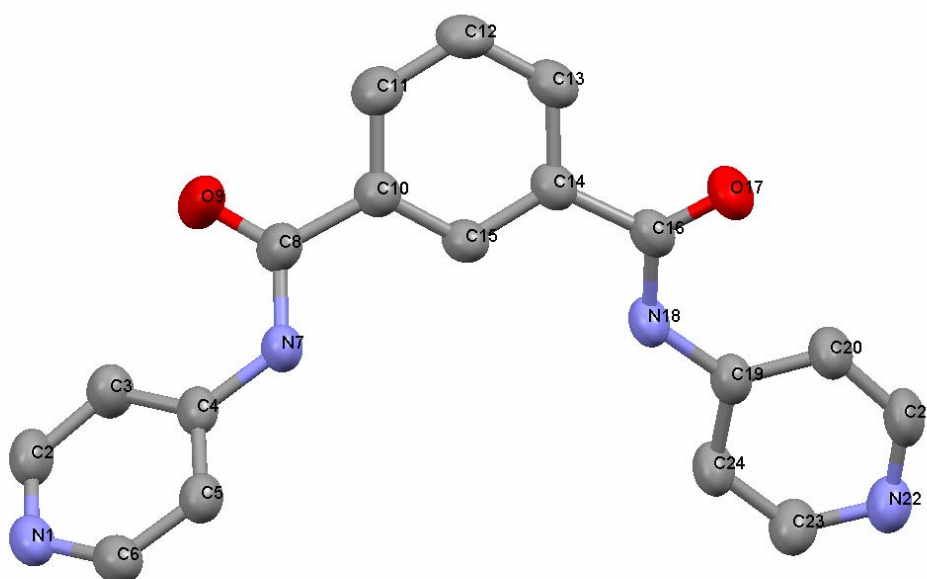

| Hydrogen bonding parameters of L1 |           |           |           |             |                          |
|-----------------------------------|-----------|-----------|-----------|-------------|--------------------------|
| D-H...A                           | D-H (Å)   | H...A (Å) | D...A (Å) | D-H...A (°) | Symmetry operation for A |
| N(7)-H(7)...N(22)                 | 0.875(18) | 2.217(18) | 3.070(2)  | 165.0(16)   | 1-x,-1/2+y,1/2-z         |
| N(18)-H(18)...N(1)                | 0.894(17) | 2.274(18) | 3.148(2)  | 165.6(14)   | -x,2-y,-z                |

**Molecular Plot of MOF-1**

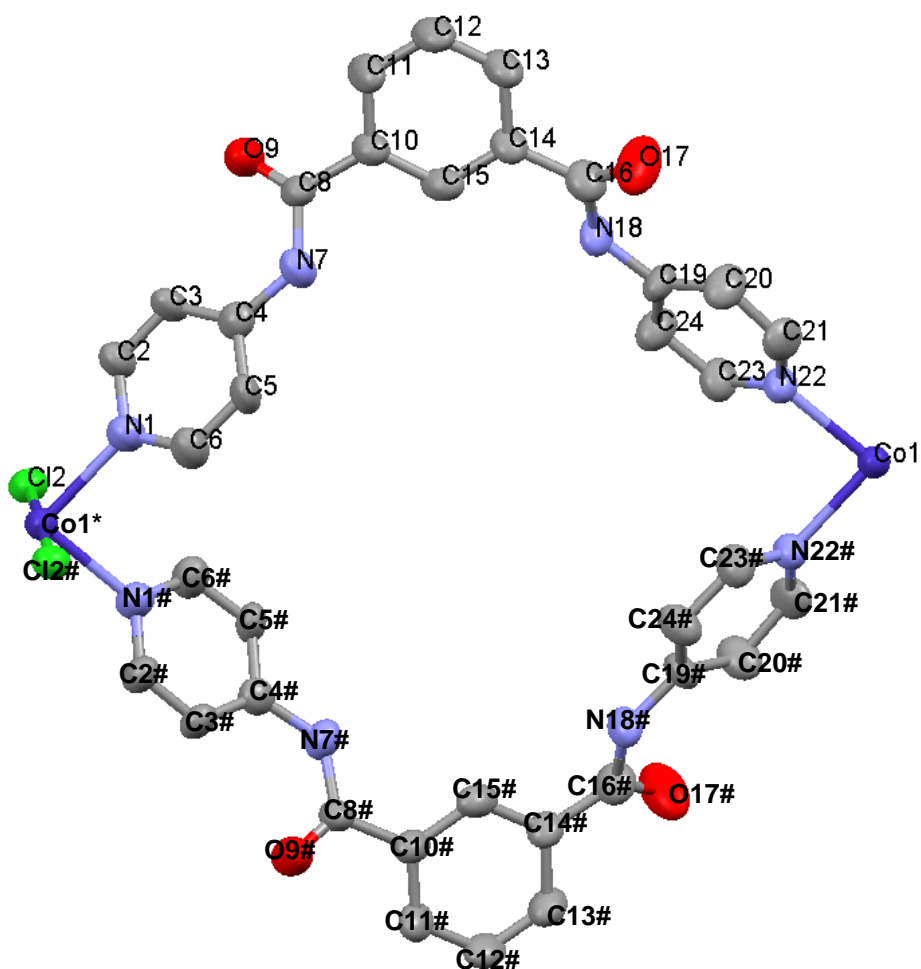

**Symmetry codes of atoms**

# x-y, -y, 1/3-z

\* 1+x, y, z

| Hydrogen bonding parameters of MOF-1 |         |           |           |             |                          |
|--------------------------------------|---------|-----------|-----------|-------------|--------------------------|
| D-H...A                              | D-H (Å) | H...A (Å) | D...A (Å) | D-H...A (°) | Symmetry operation for A |
| N(18)-H(18)...Cl(2)                  | 0.86    | 2.44      | 3.251(4)  | 156.5       | 1+y, x, -z               |

**Molecular Plot of MOF-2**

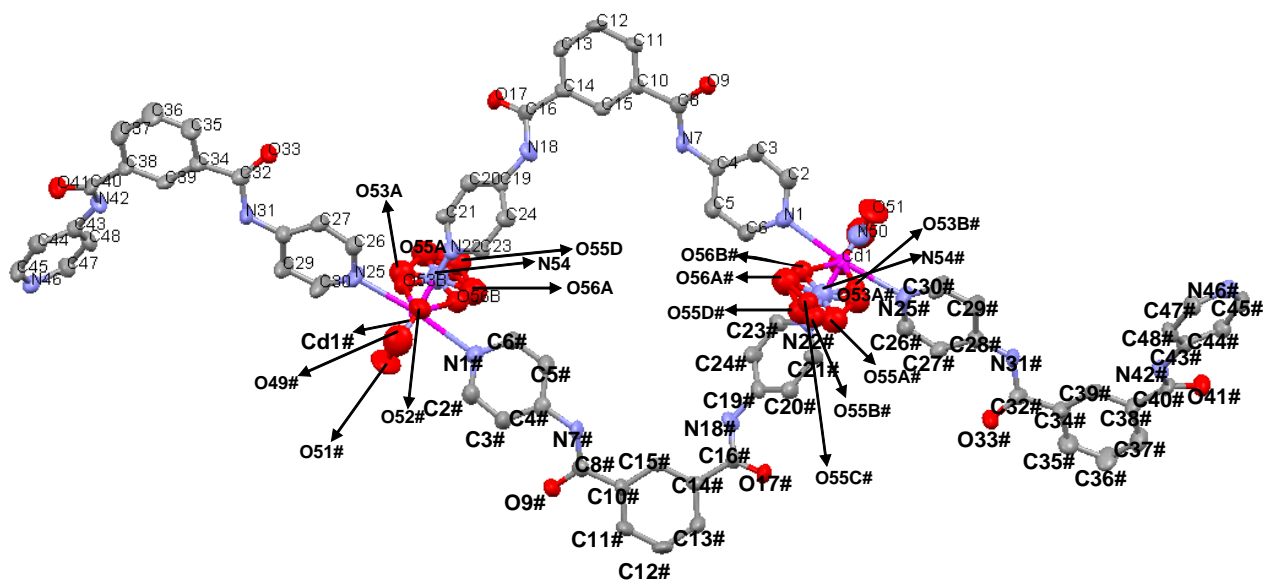

**Symmetry codes of atoms**

# -x, 1-y, -z

| <b>Hydrogen bonding parameters of MOF-2</b> |         |           |           |             |                          |
|---------------------------------------------|---------|-----------|-----------|-------------|--------------------------|
| D-H...A                                     | D-H (Å) | H...A (Å) | D...A (Å) | D-H...A (°) | Symmetry operation for A |
| N(7)-H(7)...O(52)                           | 0.86    | 2.24      | 3.024(9)  | 150.7       | 1-x, 1-y, -z             |
| N(18)-H(18)...O(9)                          | 0.86    | 2.19      | 2.949(9)  | 146.4       | -x, 2-y, -z              |
| N(42)-H(42)...O(33)                         | 0.86    | 2.12      | 2.962(9)  | 165.1       | 2-x, -y, 1-z             |

### Molecular Plot of MOF-3

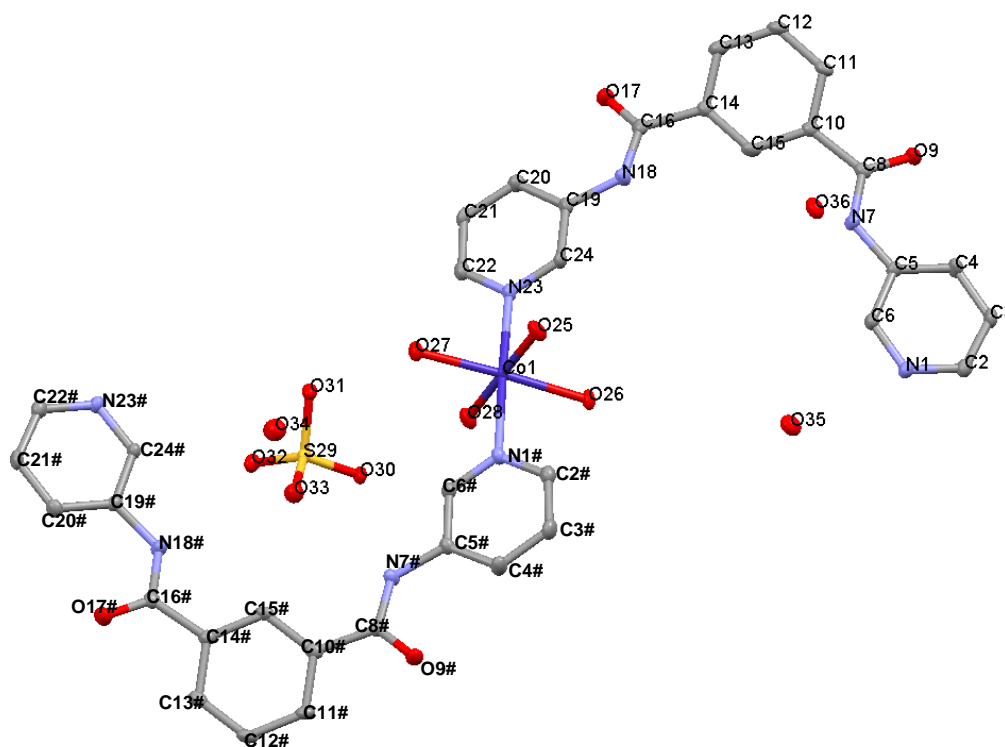

### Symmetry codes of atoms

# 1-x, 1/2+y, 1/2-z

| Hydrogen bonding parameters of MOF-3 |         |           |           |             |                          |
|--------------------------------------|---------|-----------|-----------|-------------|--------------------------|
| D-H...A                              | D-H (Å) | H...A (Å) | D...A (Å) | D-H...A (°) | Symmetry operation for A |
| N(7)-H(7)...O(33)                    | 0.86    | 2.36      | 3.182(3)  | 160.8       | 1-x, -1/2+y, 1/2-z       |
| N(18)-H(18)...O(33)                  | 0.86    | 2.51      | 3.329(3)  | 160.0       | 1-x, -1/2+y, 1/2-z       |
| O(25)-H(25A)...O(32)                 | 0.82    | 1.93      | 2.734(3)  | 167.9       | x, -1+y, z               |
| O(25)-H(25B)...O(17)                 | 0.74(4) | 2.09(4)   | 2.832(3)  | 173(4)      | 2-x, -1/2+y, 1/2-z       |
| O(26)-H(26A)...O(31)                 | 0.82    | 1.93      | 2.682(3)  | 152.8       | x, -1+y, z               |
| O(26)-H(26B)...O(36)                 | 0.79(4) | 1.92(4)   | 2.702(3)  | 170(4)      | 1-x, -y, 1-z             |
| O(27)-H(27A)...O(31)                 | 0.82    | 1.96      | 2.719(3)  | 153.0       | 1-x, -1/2+y, 1/2-z       |
| O(27)-H(27B)...O(35)                 | 0.83(4) | 1.80(4)   | 2.623(3)  | 174(4)      | x, y, z                  |
| O(28)-H(28A)...O(30)                 | 0.82    | 1.91      | 2.710(3)  | 166.1       | 1-x, -1/2+y, 1/2-z       |
| O(28)-H(28B)...O(9)                  | 0.75(4) | 2.12(4)   | 2.864(3)  | 173(4)      | -1+x, y, z               |
| O(34)-H(34A)...O(36)                 | 1.05(5) | 1.79(5)   | 2.837(3)  | 177(4)      | 1-x, 1-y, 1-z            |
| O(34)-H(34B)...O(33)                 | 0.98(6) | 1.86(6)   | 2.816(3)  | 165(5)      | x, y, z                  |
| O(35)-H(35A)...O(32)                 | 0.76(4) | 1.97(4)   | 2.712(3)  | 166(4)      | 1-x, 1-y, -z             |
| O(35)-H(35B)...O(34)                 | 0.98(5) | 1.84(5)   | 2.795(3)  | 167(4)      | 1-x, -1/2+y, 1/2-z       |
| O(36)-H(36A)...O(9)                  | 0.88(5) | 1.96(5)   | 2.797(3)  | 159(4)      | 2-x, -y, 1-z             |
| O(36)-H(36B)...O(30)                 | 0.81(5) | 1.84(5)   | 2.647(3)  | 175(4)      | 1-x, -1/2+y, 1/2-z       |

**TGA of MOF-1, MOF-2 and MOF-3**

**MOF 1**

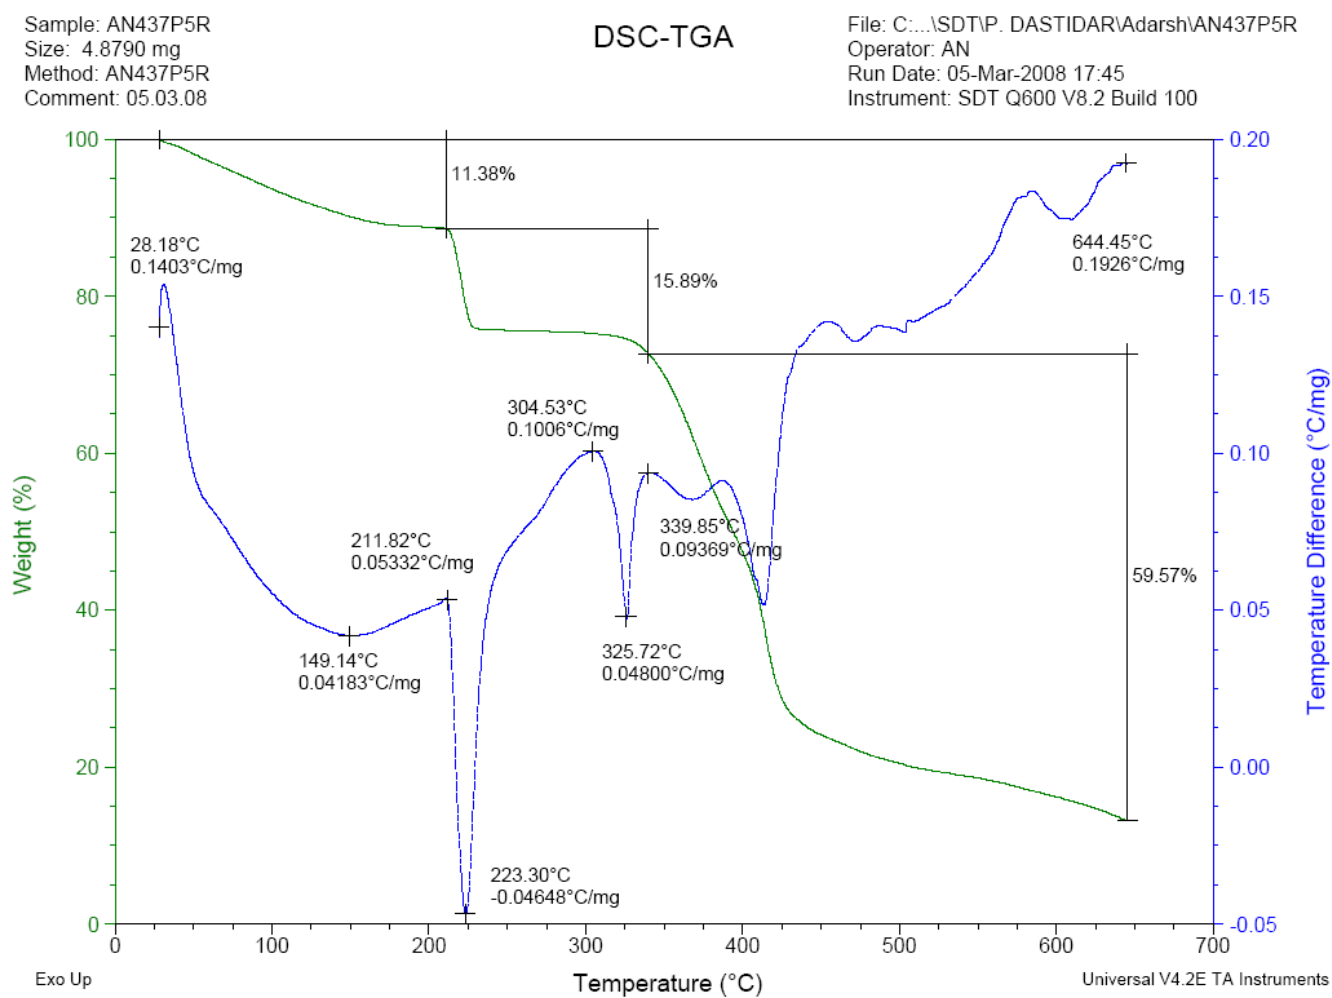

**MOF 2**

Sample: AN487B7  
Size: 5.3900 mg  
Method: AN487B7  
Comment: 11.06.08

**DSC-TGA**

File: C:\...\Adarsh\11-06-08\AN487B7  
Operator: ANN  
Run Date: 12-Jun-2008 00:34  
Instrument: SDT Q600 V8.2 Build 100

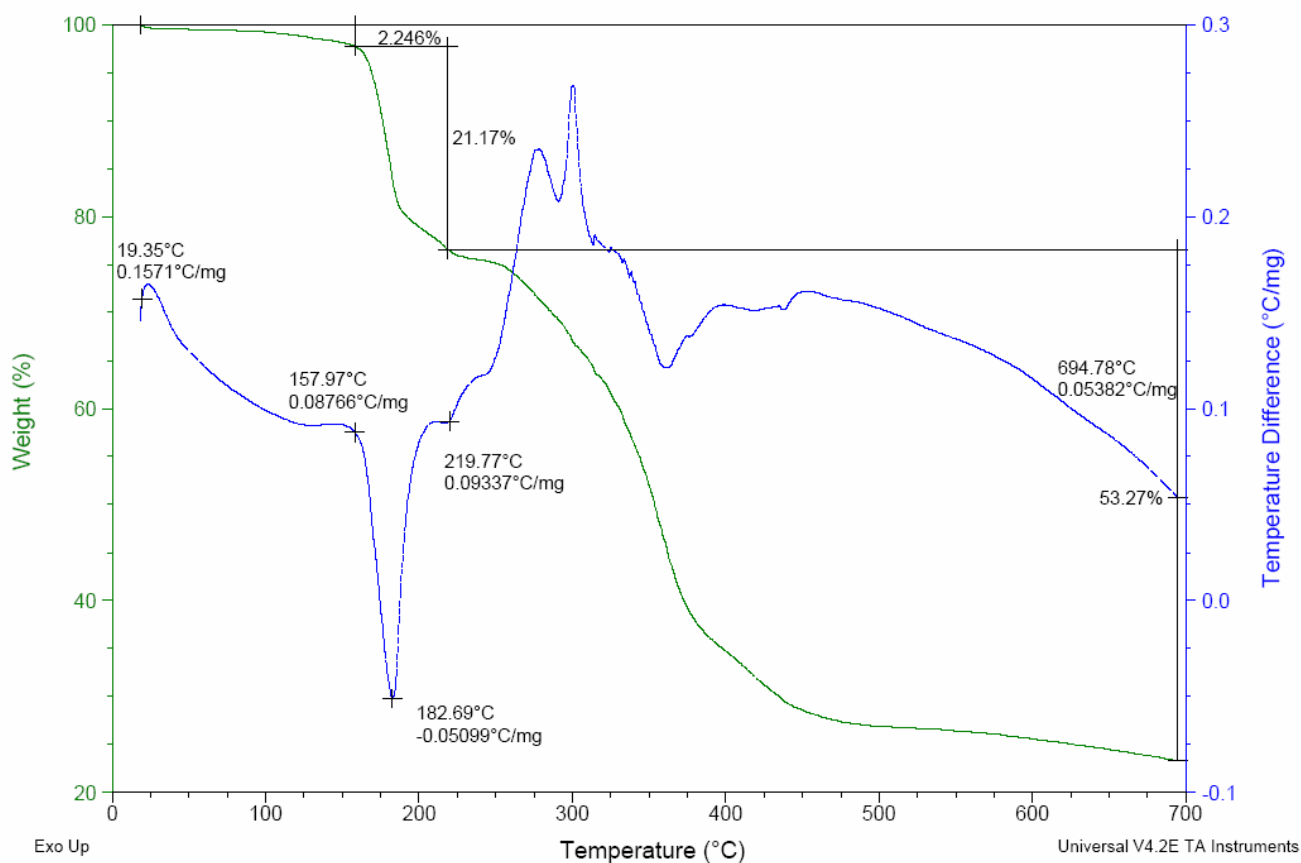

**MOF 3**

Sample: AN487A2  
Size: 5.0710 mg  
Method: AN487A2  
Comment: 04.06.08

**DSC-TGA**

File: C:\...\Adarsh\04-06-08\AN487A2  
Operator: ANN  
Run Date: 04-Jun-2008 18:32  
Instrument: SDT Q600 V8.2 Build 100

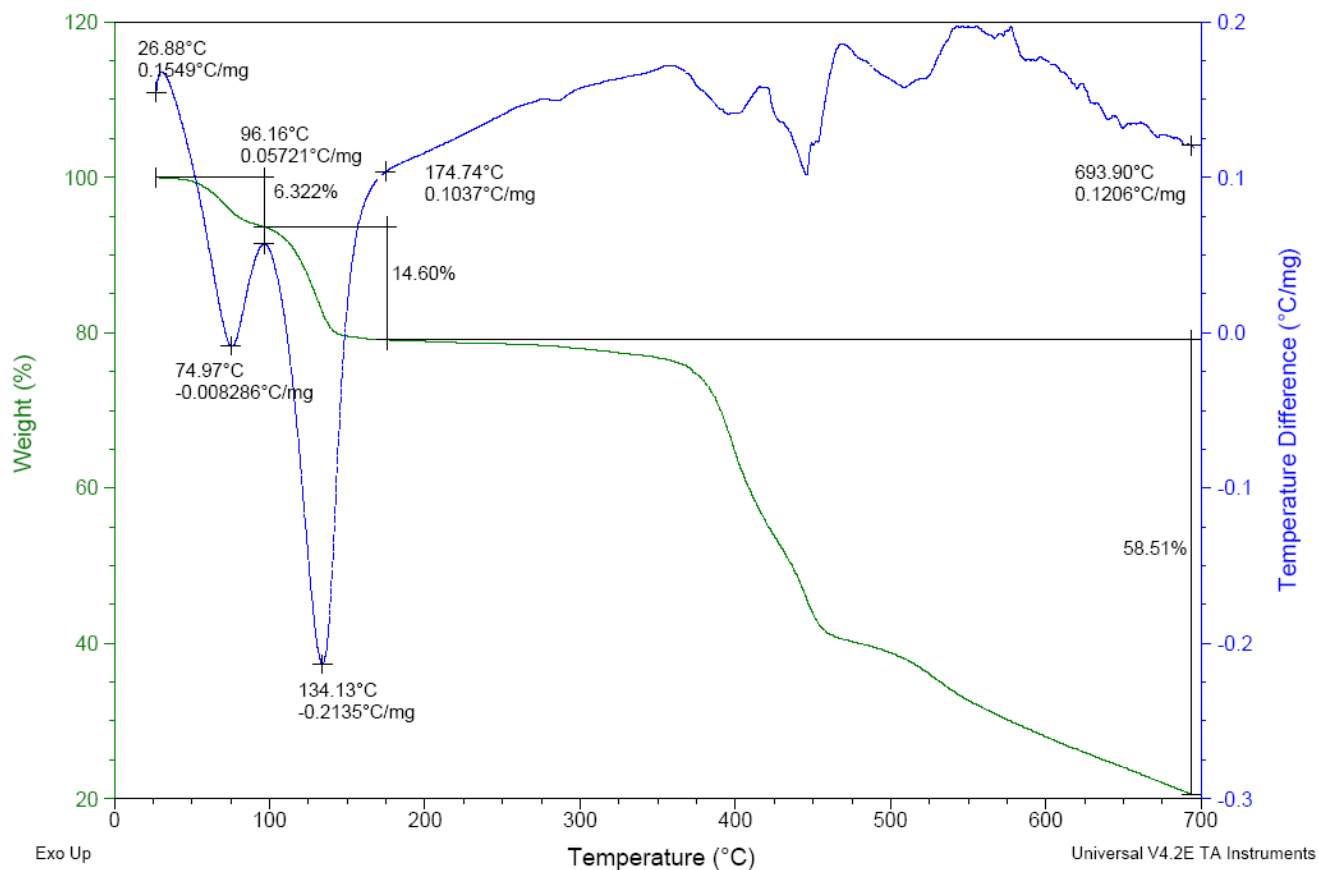

**Selective crystallization of sulfate using L1' and Cd(II) salts**

Identical experiments as carried out for **L1'** and Co(II) salts were repeated with Cd(II) salts and the isolated crystalline product was characterized by elemental analysis, FT-IR and X-ray powder diffraction. These data as listed below clearly indicate the formation of corresponding CdSO<sub>4</sub> MOF structure of which was published recently (ref. 12 of the manuscript).

**Elemental analysis:**

|                                                                                                                                                             | %                          |
|-------------------------------------------------------------------------------------------------------------------------------------------------------------|----------------------------|
| Analytical data calc. for C <sub>18</sub> H <sub>18</sub> N <sub>4</sub> O <sub>8</sub> CdS                                                                 | C, 38.41; H, 3.22; N, 9.95 |
| Found in competitive experiments<br>(L1':CdSO <sub>4</sub> :Cd(NO <sub>3</sub> ) <sub>2</sub> , Cd(OAc) <sub>2</sub> , Cd(ClO <sub>4</sub> ) <sub>2</sub> ) | C, 37.83; H, 3.50; N, 9.53 |
| L1':CdSO <sub>4</sub> : 2[Cd(NO <sub>3</sub> ) <sub>2</sub> , Cd(OAc) <sub>2</sub> , Cd(ClO <sub>4</sub> ) <sub>2</sub> ]                                   | C, 37.60; H, 3.27; N, 9.51 |

**FT-IR**

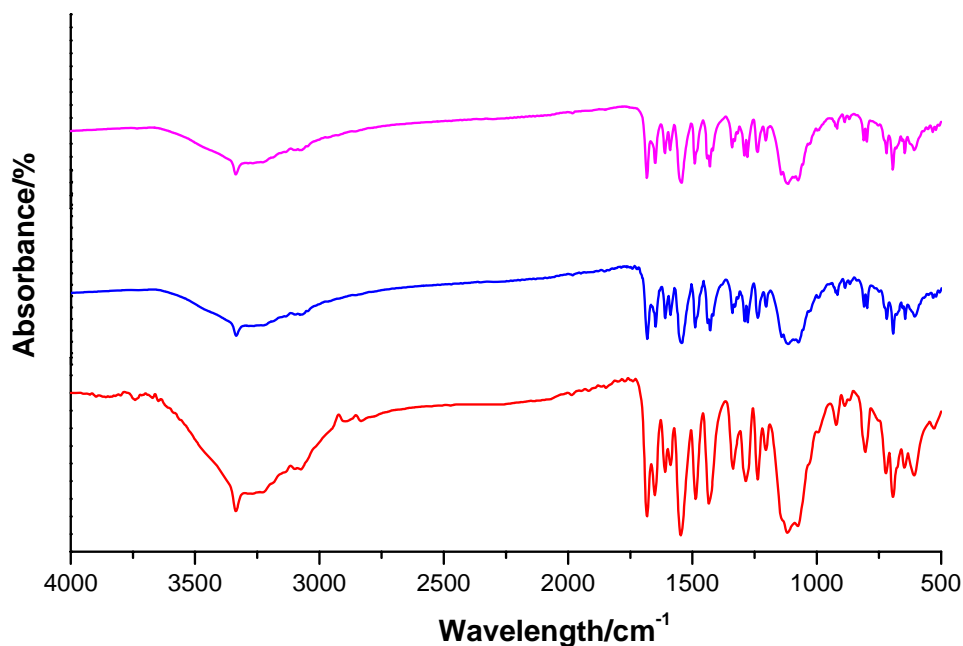

FT-IR of CdSO<sub>4</sub> MOF of **L1'** under various conditions; noncompetitive condition (red); competitive conditions - L1':CdSO<sub>4</sub>:Cd(NO<sub>3</sub>)<sub>2</sub>, Cd(OAc)<sub>2</sub>, Cd(ClO<sub>4</sub>)<sub>2</sub>, (blue), iv) L1':CdSO<sub>4</sub>: 2[Cd(NO<sub>3</sub>)<sub>2</sub>, Cd(OAc)<sub>2</sub>, Cd(ClO<sub>4</sub>)<sub>2</sub>] (magenta).



**XRPD**

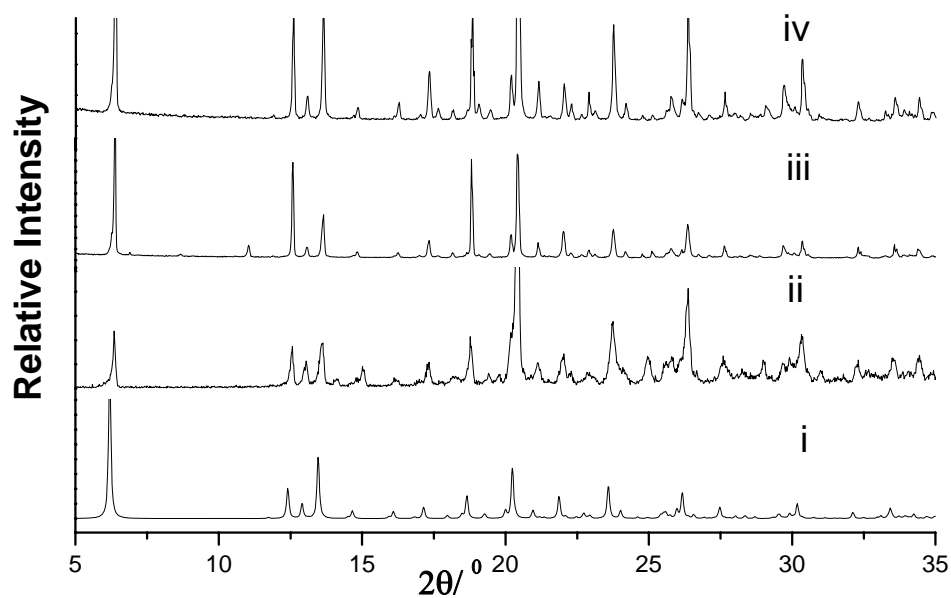

XRPD patterns i) Simulated from the single crystal data of CdSO<sub>4</sub> MOF of **L1'**; ii) bulk solid under noncompetitive condition; under competitive conditions – iii) L1':CdSO<sub>4</sub>:Cd(NO<sub>3</sub>)<sub>2</sub>, Cd(OAc)<sub>2</sub>, Cd(ClO<sub>4</sub>)<sub>2</sub>, iv) L1':CdSO<sub>4</sub>: 2[Cd(NO<sub>3</sub>)<sub>2</sub>, Cd(OAc)<sub>2</sub>, Cd(ClO<sub>4</sub>)<sub>2</sub>].
